# Supplementary material for: Optimization of ionic liquid based dispersive liquid–liquid microextraction combined with dispersive micro-solid phase extraction for the spectrofluorimetric determination of sulfasalazine in aqueous samples by response surface methodology
Source: Royal Society of Chemistry journal article supplement (doi:10.1039/c6ra20223c), 2016-01-01
Supplement: c6ra20223c1.pdf [file c6ra20223c1.pdf]

**Optimization of Ionic liquid based dispersive liquid–liquid microextraction combined with dispersive micro-solid phase extraction for the spectrofluorimetric determination of sulfasalazine in aqueous samples by response surface methodology**

Susan Sadeghi<sup>\*1</sup>, Samieh Oliaci<sup>1</sup>

<sup>1</sup>Department of Chemistry, Faculty of Science, University of Birjand, Birjand, Iran

**8<sup>th</sup> December 2016**

**Note added after first publication:** This Supplementary Information file replaces that originally published on 2<sup>nd</sup> December 2016, and contains corrected Figures 1S and 2S.

---

\* Corresponding author. Tel/Fax: +98 5632202009  
E-mail address: ssadeghi@birjand.ac.ir (S. Sadeghi)

## Figure captions

**Fig. 1S.** Effect of each factor on the extraction efficiency: (A) sonication time; (B) absorbent dosage; (C) volume of IL; (D) pH

**Fig. 2S.** Two-factor interactions and their effects on the efficiency: (A) volume of IL- sonication time; (B) pH-absorbent dosage; (C) pH-sonication time; (D) pH-volume of IL; (E) sonication time-absorbent dosage.

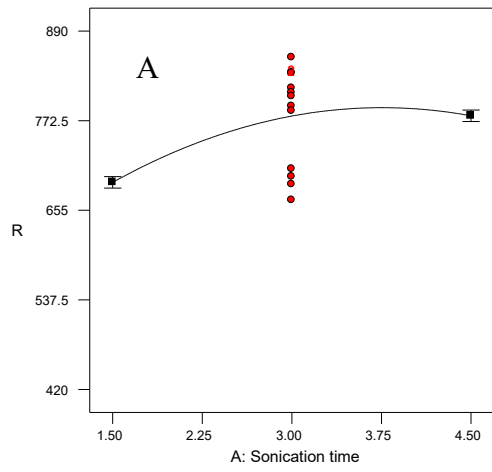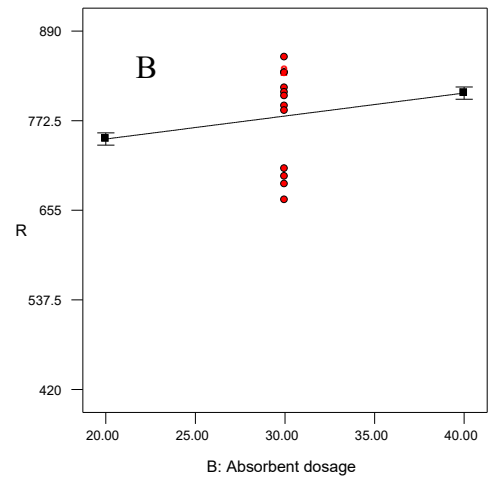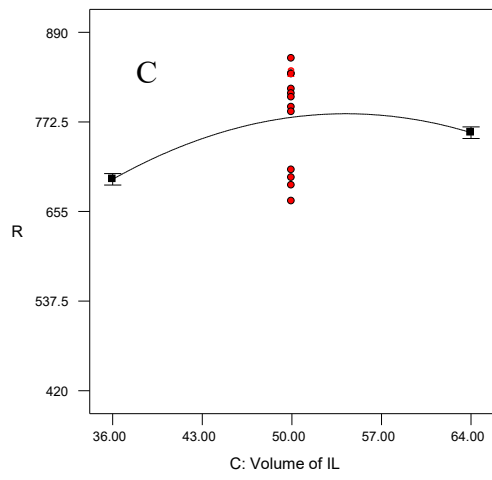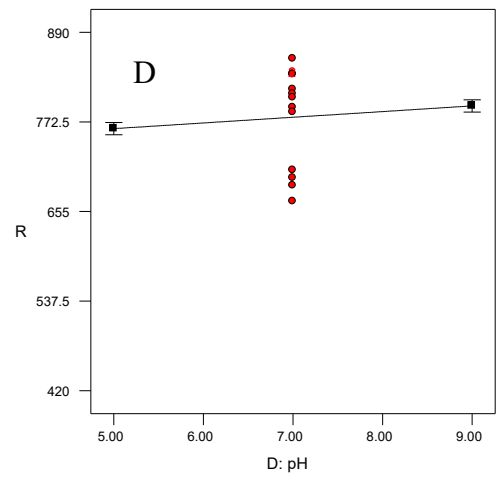

**Figure 1S**

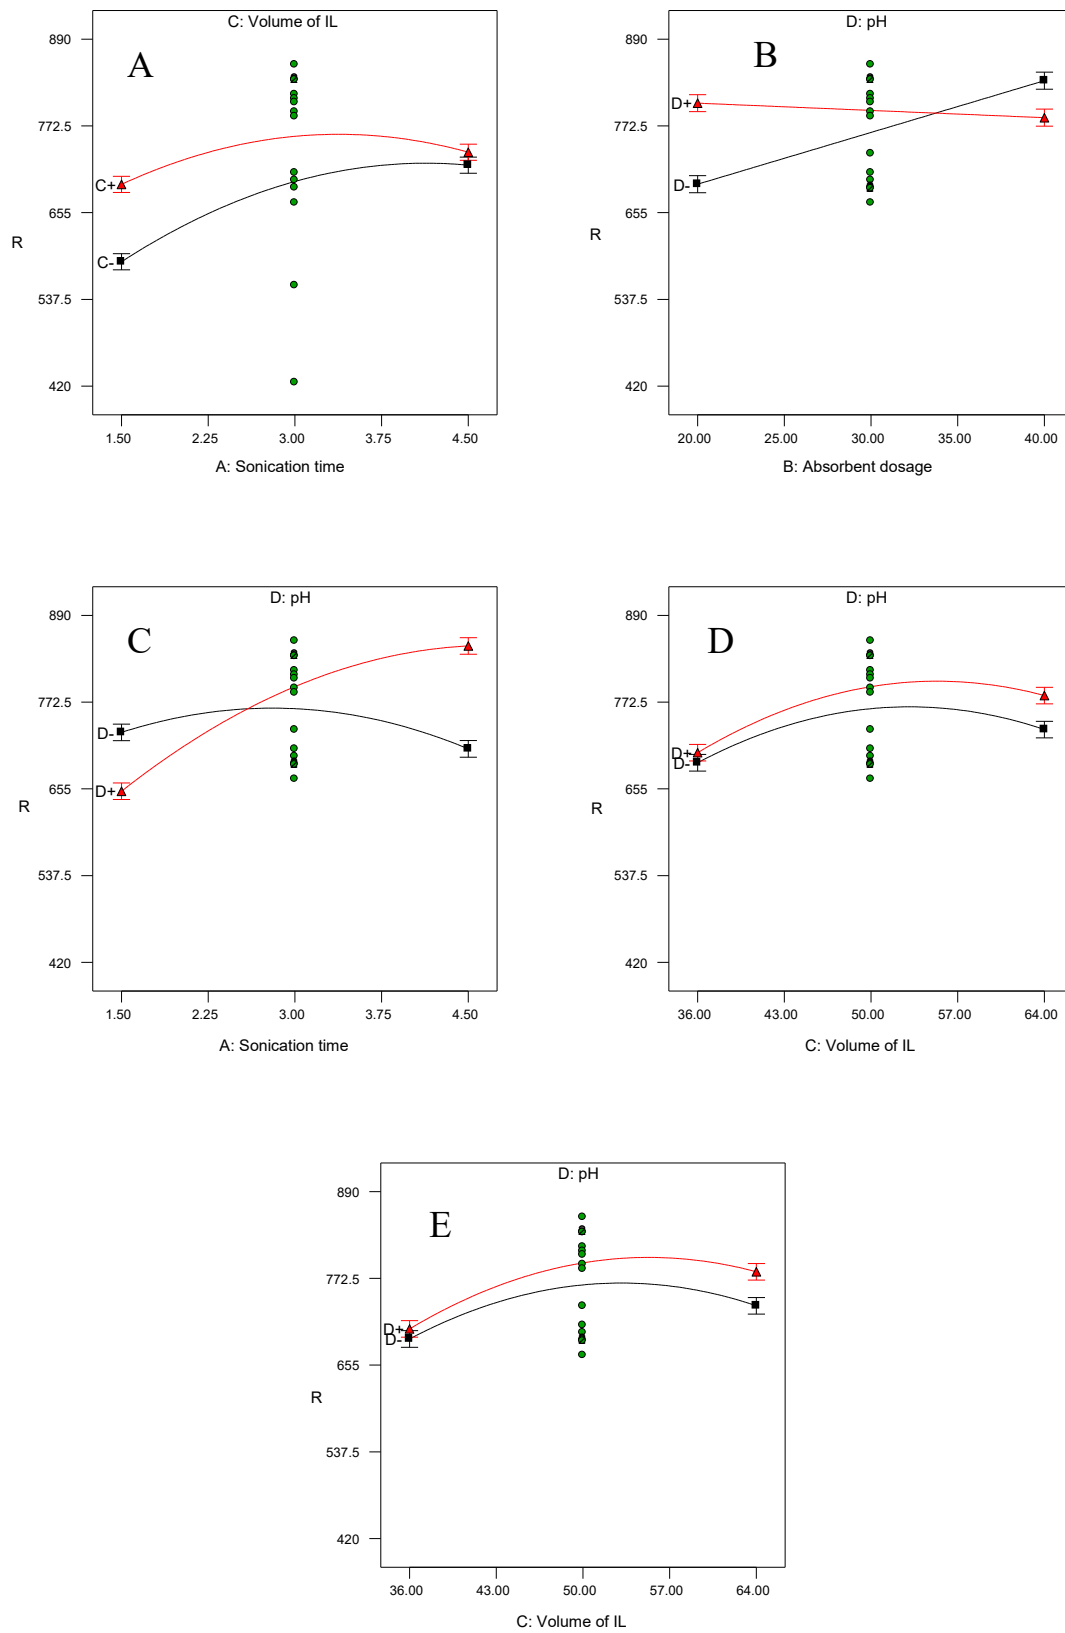

**Figure 2S**

**Table 1S.**Design matrix and responses for the fractional factorial design.

| Run | Block | A  | B  | C  | D  | E  | R <sup>a</sup> |
|-----|-------|----|----|----|----|----|----------------|
| 1   | 1     | 0  | 0  | 0  | 0  | 0  | 368.5          |
| 2   | 1     | 1  | -1 | -1 | 1  | 1  | 728.0          |
| 3   | 1     | -1 | 1  | -1 | -1 | 1  | 314.5          |
| 4   | 1     | 0  | 0  | 0  | 0  | 0  | 310.5          |
| 5   | 1     | 1  | 1  | -1 | 1  | -1 | 529.8          |
| 6   | 1     | -1 | -1 | 1  | 1  | -1 | 1189.1         |
| 7   | 1     | 0  | 0  | 0  | 0  | 0  | 254.2          |
| 8   | 1     | -1 | 1  | 1  | 1  | 1  | 1328.3         |
| 9   | 1     | 1  | -1 | 1  | -1 | 1  | 1119.1         |
| 10  | 1     | 1  | 1  | 1  | -1 | -1 | 1159.5         |
| 11  | 1     | -1 | -1 | -1 | -1 | -1 | 257.5          |
| 12  | 2     | 0  | 0  | 0  | 0  | 0  | 369.6          |
| 13  | 2     | 1  | -1 | 1  | 1  | -1 | 1207.8         |
| 14  | 2     | -1 | -1 | 1  | -1 | 1  | 722.0          |
| 15  | 2     | 1  | -1 | -1 | -1 | -1 | 252.3          |
| 16  | 2     | 0  | 0  | 0  | 0  | 0  | 280.1          |
| 17  | 2     | 1  | 1  | -1 | -1 | 1  | 444.2          |
| 18  | 2     | -1 | 1  | 1  | -1 | -1 | 1000.0         |
| 19  | 2     | -1 | -1 | -1 | 1  | 1  | 434.0          |
| 20  | 2     | 0  | 0  | 0  | 0  | 0  | 319.2          |
| 21  | 2     | -1 | 1  | -1 | 1  | -1 | 532.5          |
| 22  | 2     | 1  | 1  | 1  | 1  | 1  | 1457.0         |

<sup>a</sup> $\Delta I = I_0 - I_F$  difference in fluorescence intensities of the blank and sample solutions.

**Table 2S.** Design matrix and responses for the central composite design.

| Run | Block | A  | B  | C  | D  | R <sup>a</sup> |
|-----|-------|----|----|----|----|----------------|
| 1   | 1     | 1  | 1  | 1  | -1 | 817.9          |
| 2   | 1     | -1 | -1 | 1  | -1 | 733.2          |
| 3   | 1     | -1 | 1  | -1 | -1 | 718.4          |
| 4   | 1     | 0  | 0  | 0  | 0  | 791.3          |
| 5   | 1     | 1  | -1 | -1 | -1 | 587.4          |
| 6   | 1     | -1 | 1  | 1  | 1  | 665.7          |
| 7   | 1     | 0  | 0  | 0  | 0  | 814.9          |
| 8   | 1     | 1  | -1 | 1  | 1  | 830.9          |
| 9   | 1     | 0  | 0  | 0  | 0  | 855.3          |
| 10  | 1     | -1 | -1 | -1 | 1  | 618.4          |
| 11  | 1     | 0  | 0  | 0  | 0  | 835.1          |
| 12  | 1     | 1  | 1  | -1 | 1  | 854.5          |
| 13  | 2     | -1 | 1  | 1  | -1 | 786.2          |
| 14  | 2     | 1  | 1  | -1 | -1 | 811.2          |
| 15  | 2     | 0  | 0  | 0  | 0  | 785.1          |
| 16  | 2     | 1  | -1 | 1  | -1 | 590.1          |
| 17  | 2     | -1 | 1  | -1 | 1  | 542.3          |
| 18  | 2     | -1 | -1 | 1  | 1  | 744.1          |
| 19  | 2     | 1  | -1 | -1 | 1  | 808.2          |
| 20  | 2     | 0  | 0  | 0  | 0  | 808.9          |
| 21  | 2     | 1  | 1  | 1  | 1  | 883.2          |
| 22  | 2     | 0  | 0  | 0  | 0  | 804.2          |
| 23  | 2     | -1 | -1 | -1 | -1 | 639.5          |
| 24  | 2     | 0  | 0  | 0  | 0  | 834.6          |
| 25  | 2     | 0  | 0  | 0  | 2  | 734.7          |
| 26  | 3     | 0  | 0  | 2  | 0  | 556.2          |
| 27  | 3     | 0  | 0  | 0  | 0  | 668.2          |
| 28  | 3     | 0  | 0  | 0  | 0  | 698.8          |
| 29  | 3     | -2 | 0  | 0  | 0  | 442.4          |
| 30  | 3     | 0  | 0  | 0  | 0  | 708.9          |
| 31  | 3     | 2  | 0  | 0  | 0  | 598.3          |
| 32  | 3     | 0  | 0  | 0  | 0  | 688.8          |
| 33  | 3     | 0  | 0  | -2 | 0  | 424.7          |
| 34  | 3     | 0  | 0  | 0  | -2 | 687.4          |
| 35  | 3     | 0  | -2 | 0  | 0  | 651.4          |
| 36  | 3     | 0  | 2  | 0  | 0  | 749.2          |

<sup>a</sup> $\Delta I = I_0 - I_F$  difference in fluorescence intensities of the blank and sample solutions.
